# Supplementary material for: Regulation of mutant TERT by BRAF V600E/MAP kinase pathway through FOS/GABP in human cancer
Source: PubMed Central journal article supplement (PMC5805723; doi:10.1038/s41467-018-03033-1), 2018-02-08
Supplement: 41467_2018_3033_MOESM1_ESM.pdf [file 41467_2018_3033_MOESM1_ESM.pdf]

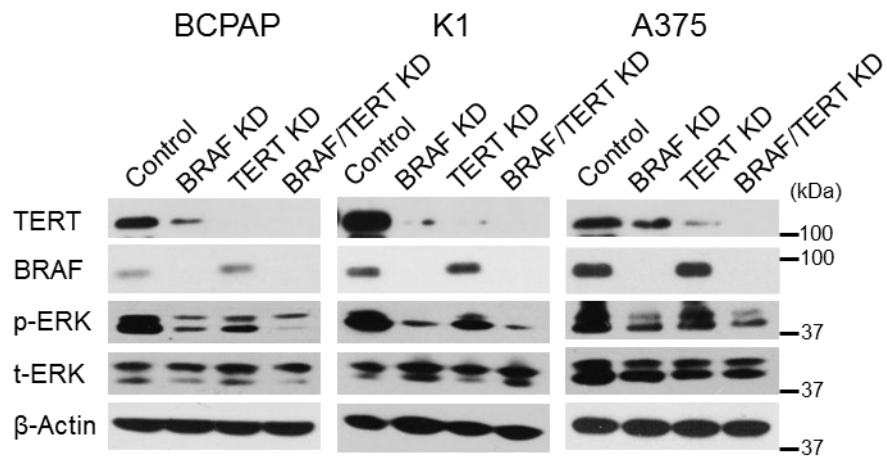

**Supplementary Figure 1. Western blotting analyses of TERT, BRAF, phosphorylation of ERK (p-ERK), total ERK (t-ERK), and beta-Actin.** Control scramble shRNA- or BRAF shRNA- expressing cells were co-transfected with control siRNA or TERT siRNA to also knockdown (KD) TERT.

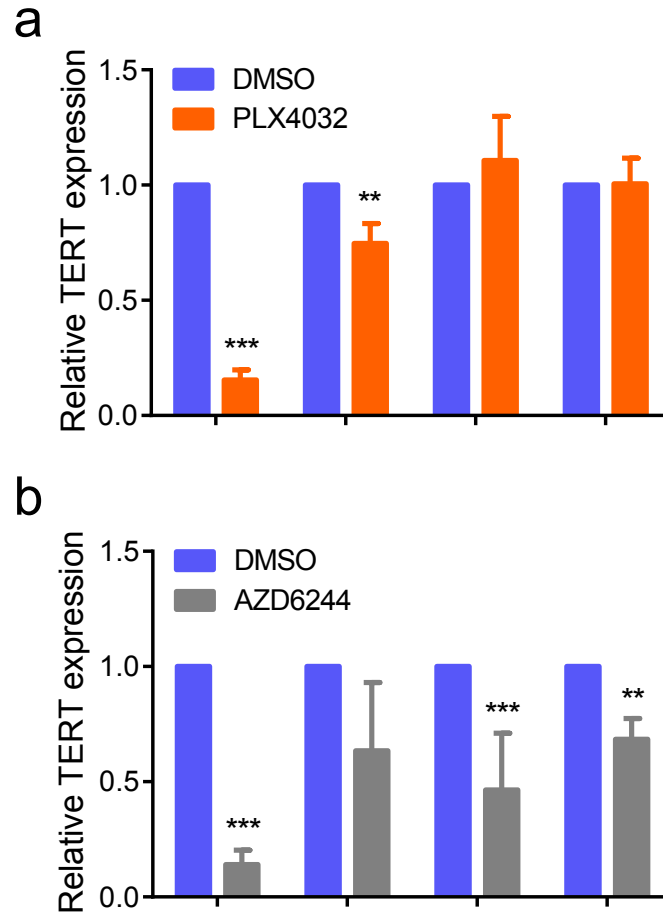

**Supplementary Figure 2. Summarized effects of PLX4032 (A) and AZD6244 (B) on *TERT* mRNA expression.** Each bar represents the average  $\pm$  SD of the cells with the same genotypes as follows: BRAF-mut and TERT-mut cell lines: BCPAP, K1, OCUT1, A375, and M14; BRAF-mut and TERT-wt cell lines: SK-MEL-1, SK-MEL-3, and RKO; BRAF-wt and TERT-mut cell lines: TPC1, KAT18, C643, CHL-1, SK-MEL-2, and Mewo; BRAF-wt and TERT-wt cell lines: FB1, WRO, and HTORI3. Compared with the corresponding control of DMSO, \*\* $P < 0.01$ , \*\*\* $P < 0.001$ , by independent *t*-test.

**Figure 1e**

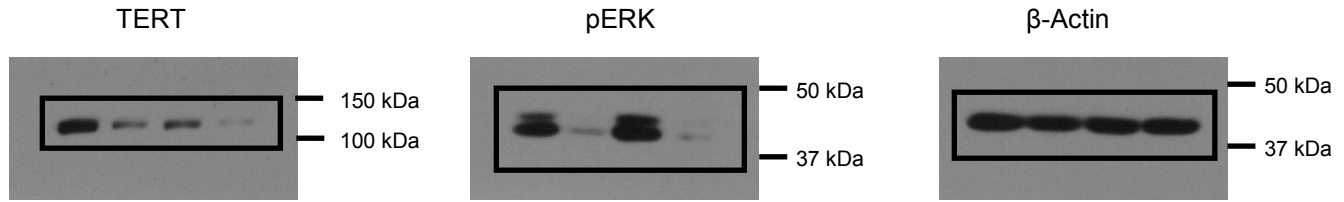

**Figure 2a**

**p-ERK:**

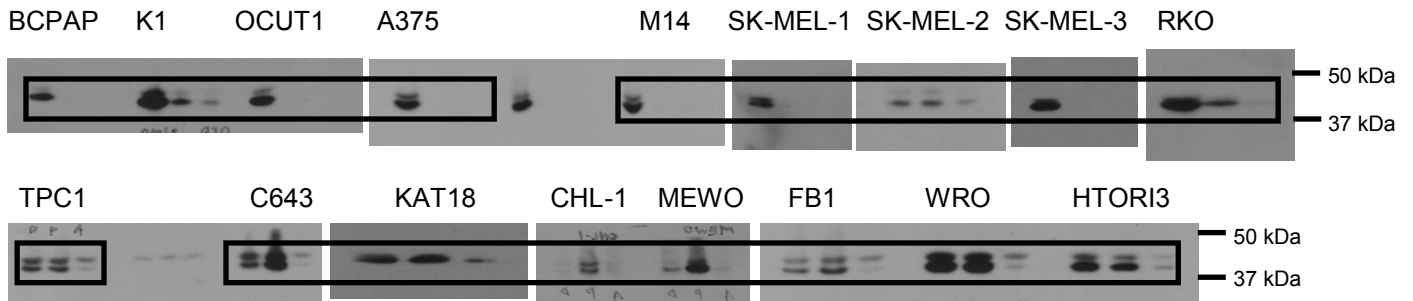

**beta-Actin:**

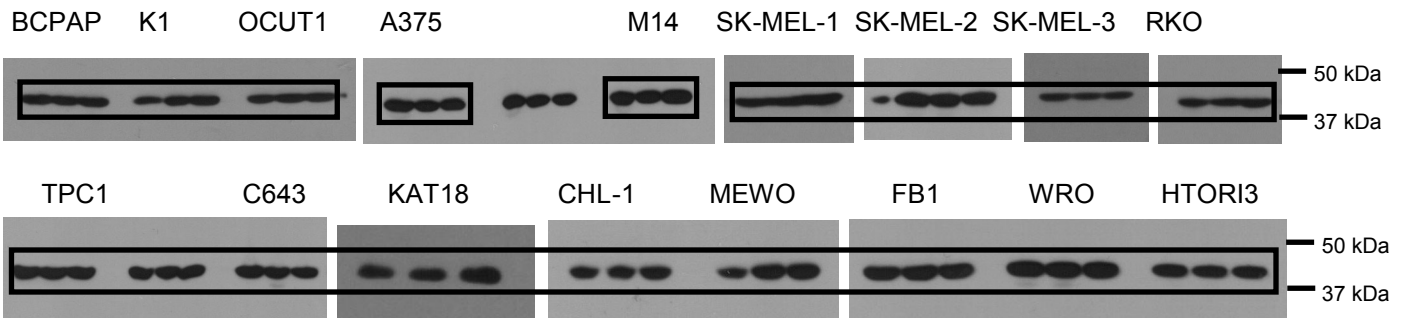

**t-ERK:**

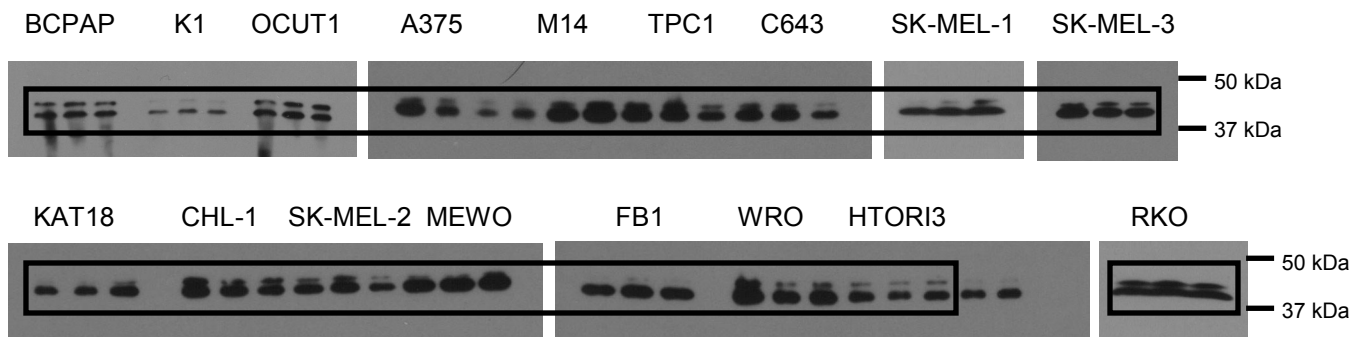

**Supplementary Figure 3. Uncropped western blotting images for Figures 1e and 2a.**

**Figure 2c**

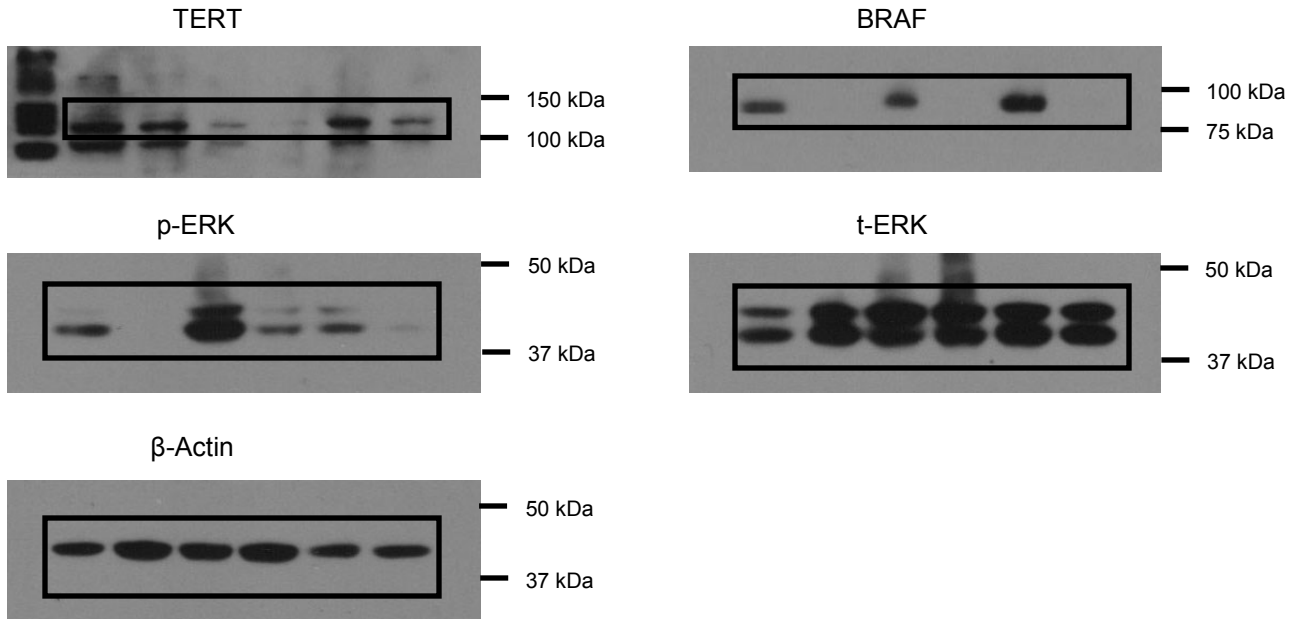

**Figure 2f**

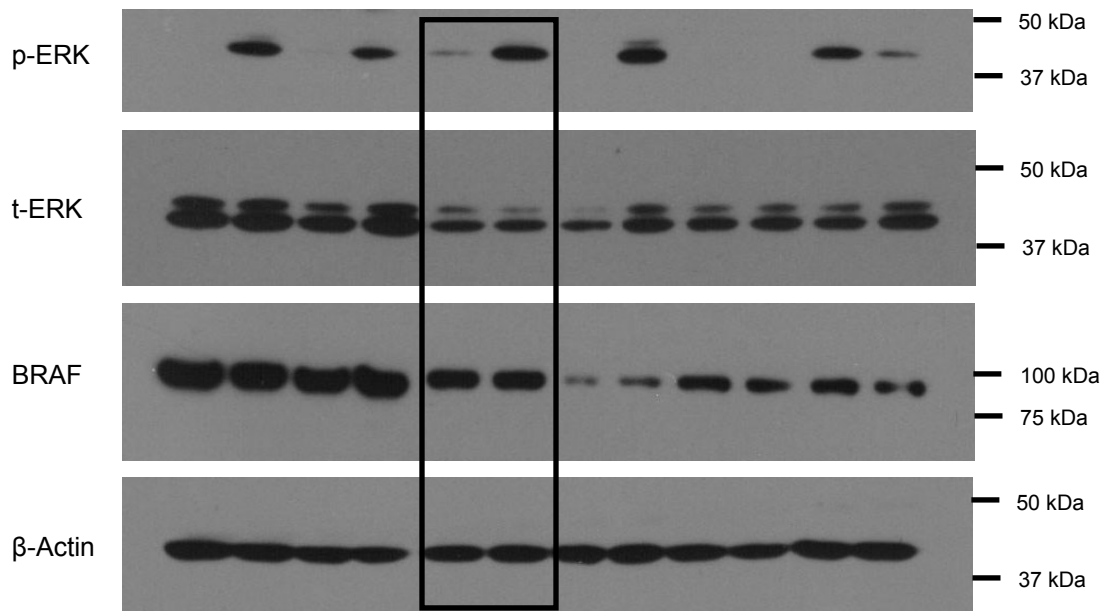

**Supplementary Figure 4. Uncropped western blotting images for Figures 2c and 2f.**

**Figure 3a**

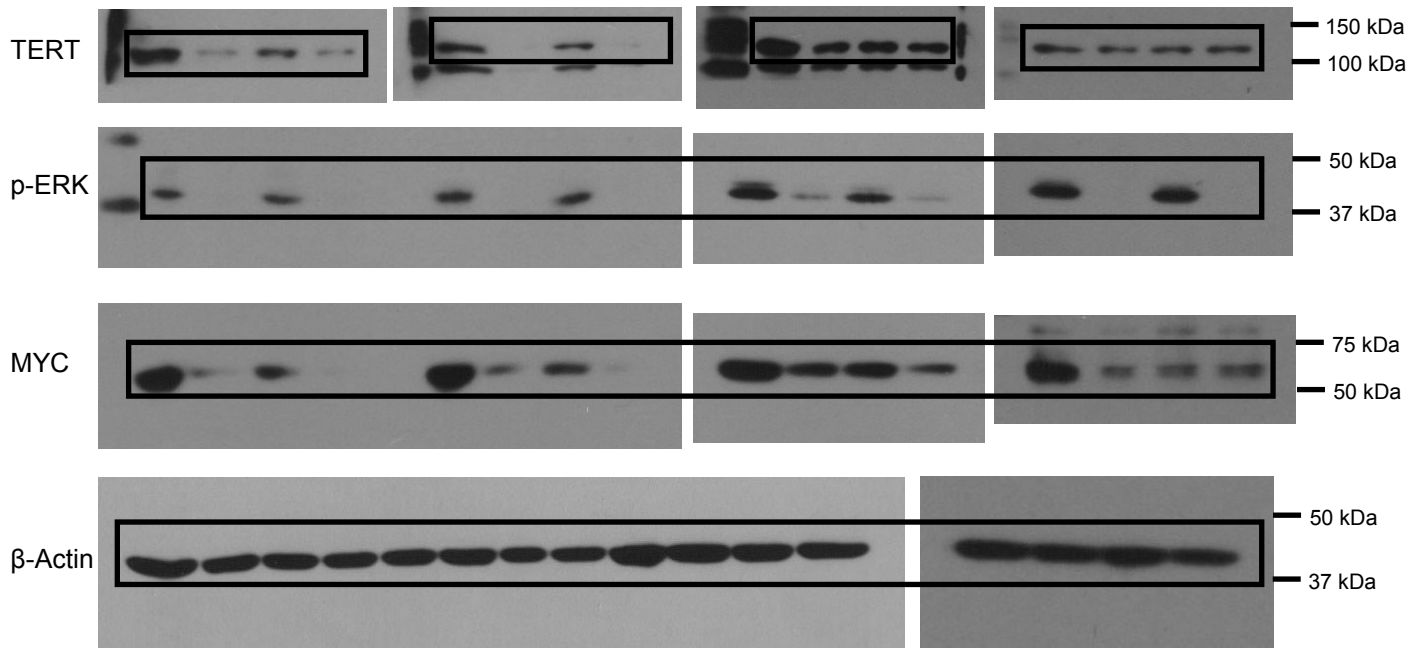

**Figure 3b**

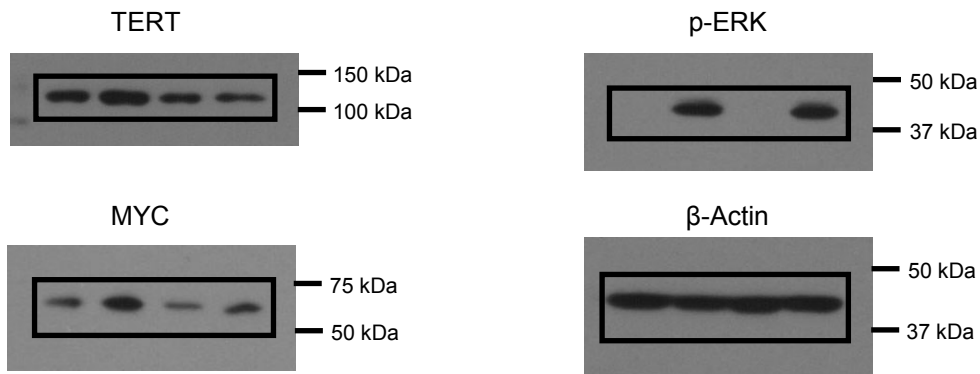

**Figure 4b**

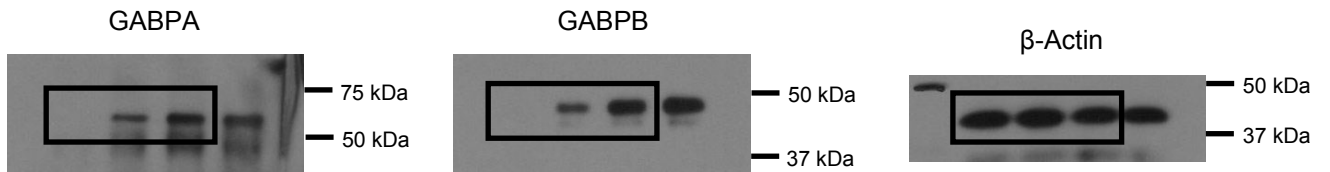

**Figure 4d**

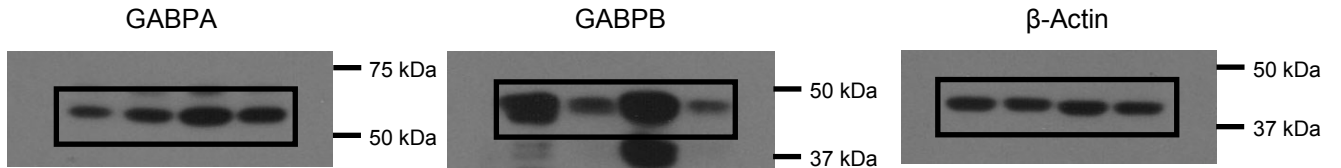

**Supplementary Figure 5. Uncropped blots for Figures 3a, 3b, 4b, and 4d.**

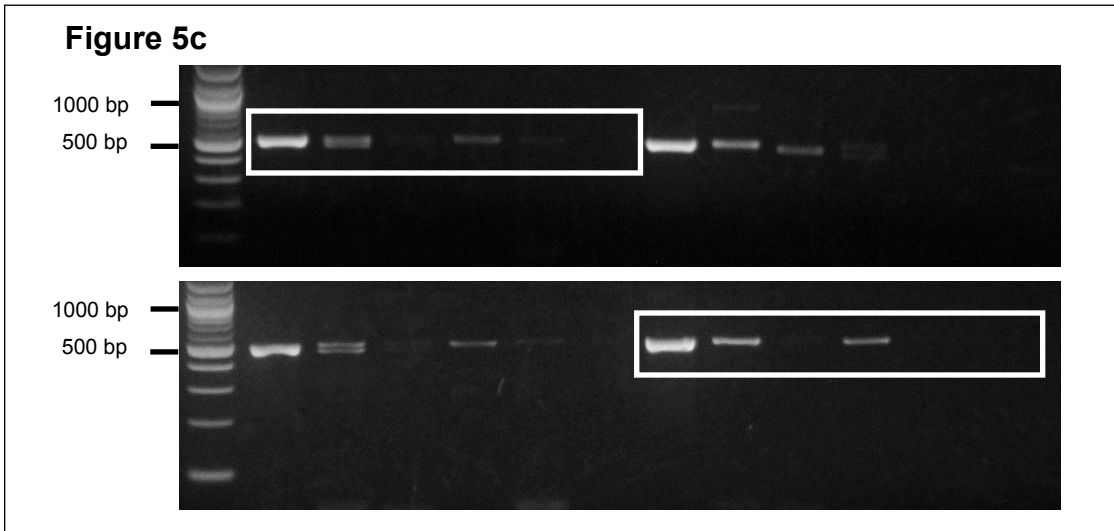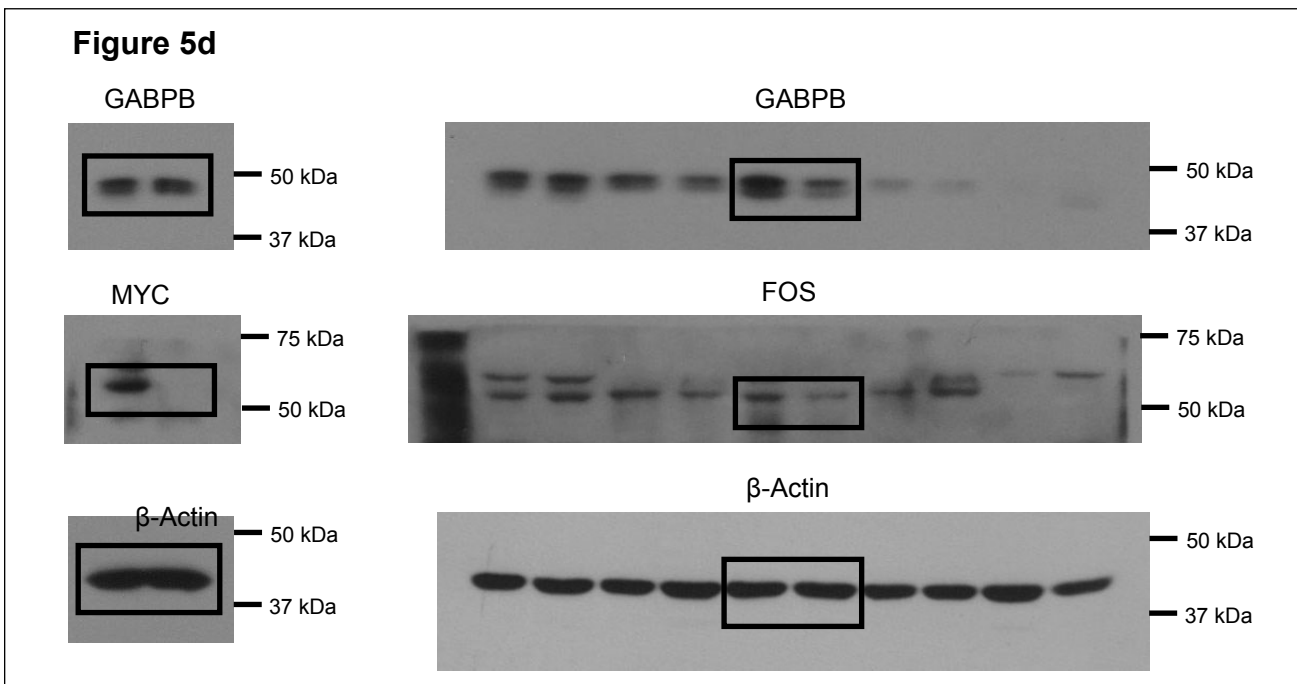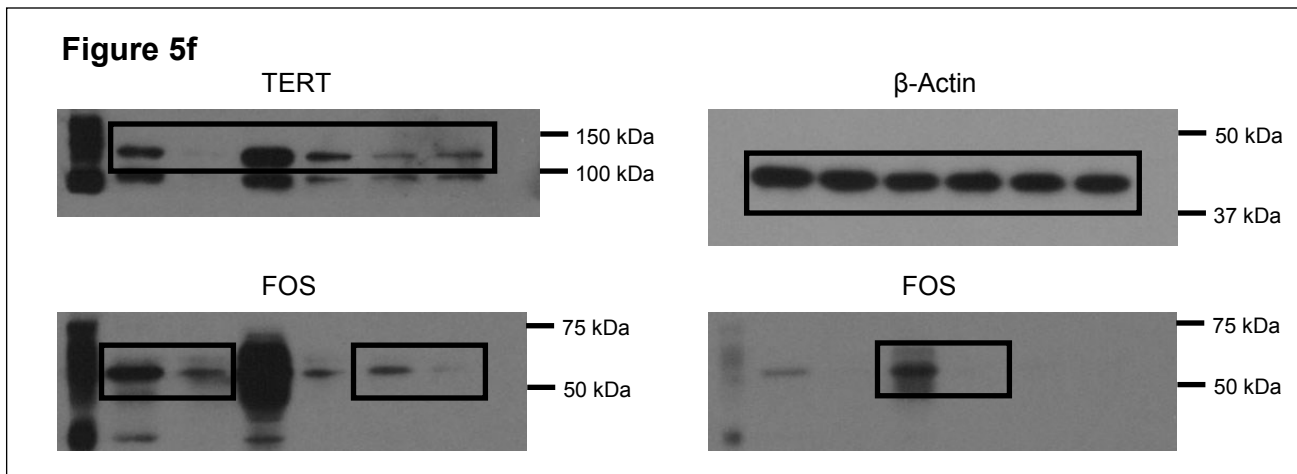

**Supplementary Figure 6. Uncropped gel images for Figure 5c, and uncropped western blotting images for Figures 5d and 5f.**

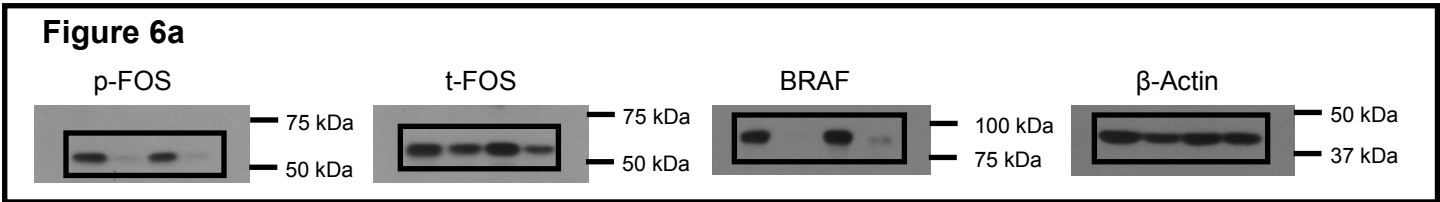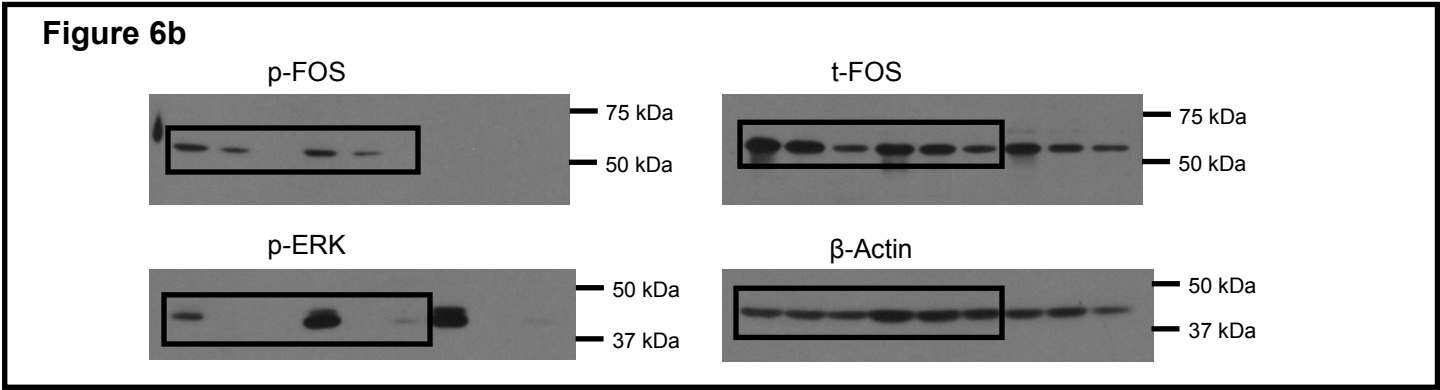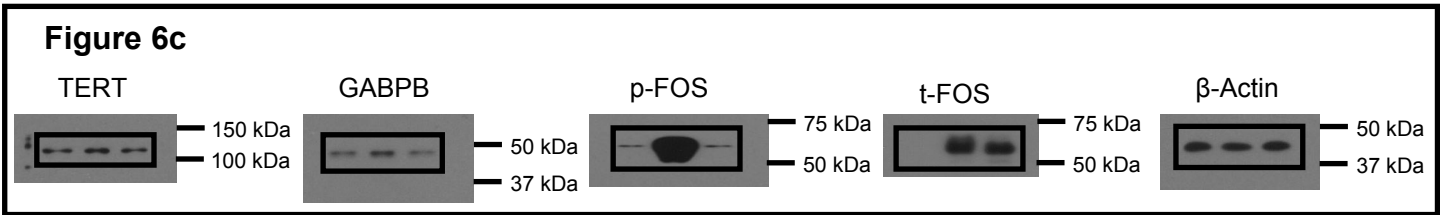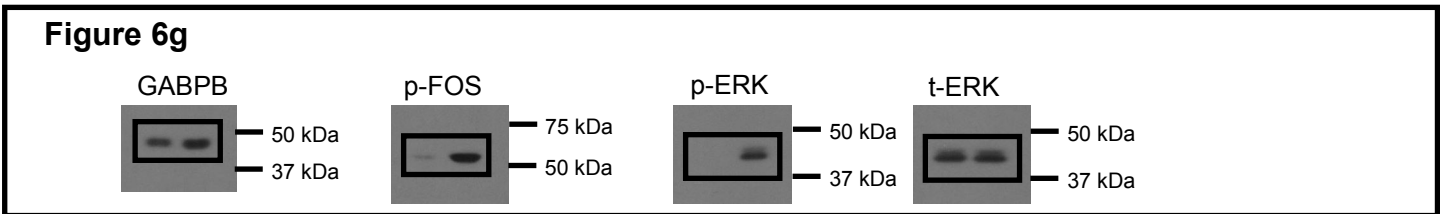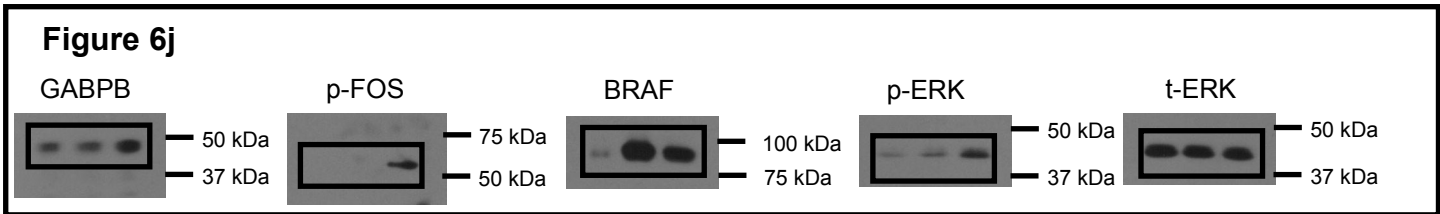

Supplementary Figure 7. Uncropped western blotting images for Figures 6a, 6b, 6c, 6g and 6j.

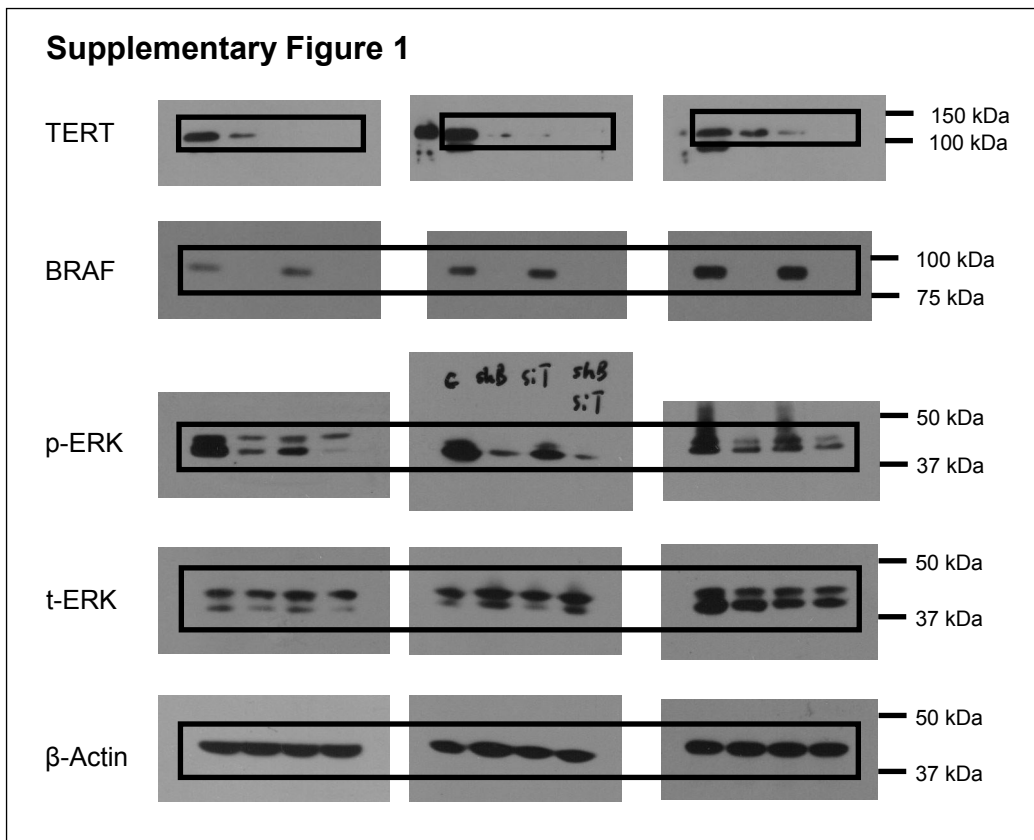

**Supplementary Figure 8. Uncropped western blotting images for Supplementary Figure 1.**



**Supplementary Table 1. Genotypes of *BRAF* and *TERT* genes in various human cancer cell lines used in the present study**

| Cell line | <i>BRAF</i>         | <i>TERT</i> promoter      | Derivation         |
|-----------|---------------------|---------------------------|--------------------|
| BCPAP     | V600E, homozygous   | C228T/C229T, heterozygous | thyroid carcinoma  |
| K1        | V600E, heterozygous | C228T, heterozygous       | thyroid carcinoma  |
| OCUT1     | V600E, heterozygous | C250T, homozygous         | thyroid carcinoma  |
| TPC1      | wildtype            | C228T, heterozygous       | thyroid carcinoma  |
| KAT18     | wildtype            | C228T, heterozygous       | thyroid carcinoma  |
| C643      | wildtype            | C228T, heterozygous       | thyroid carcinoma  |
| FB1       | wildtype            | wildtype                  | thyroid carcinoma  |
| WRO       | wildtype            | wildtype                  | thyroid carcinoma  |
| HTORI3    | wildtype            | wildtype                  | thyroid epithelium |
| A375      | V600E, homozygous   | C250T, heterozygous       | melanoma           |
| M14       | V600E, heterozygous | C250T, heterozygous       | melanoma           |
| SK-MEL-1  | V600E, heterozygous | wildtype                  | melanoma           |
| SK-MEL-3  | V600E, heterozygous | wildtype                  | melanoma           |
| SK-MEL-2  | wildtype            | C250T, homozygous         | melanoma           |
| MeWo      | wildtype            | C250T, heterozygous       | melanoma           |
| CHL-1     | wildtype            | C228T, heterozygous       | melanoma           |
| RKO       | V600E, homozygous   | wildtype                  | colon carcinoma    |
| SW48      | wildtype            | wildtype                  | colon carcinoma    |

**Supplementary Table 2. Primer sequences for qRT-PCR, luciferase reporters cloning, Mutagenesis, and ChIP assays used in the present study**

| Name                                  | Primer Sequence 5'-3'                       |
|---------------------------------------|---------------------------------------------|
| <b>qRT-PCR</b>                        |                                             |
| TERT-F                                | 5'-GTCCGAGGTGTCCCTGAGTA-3'                  |
| TERT-R                                | 5'-CAGGGCCTCGTCTTCTACAG-3'                  |
| GAPDH-F                               | 5'-TGCACCACCAACTGCTTAGC-3'                  |
| GAPDH-R                               | 5'-GGCATGGACTGTGGTCATGAG-3'                 |
| <b>Luciferase reporter constructs</b> |                                             |
| GABPA-F                               | 5'-GGGGTACCACTGACCGGCCAAAGGTTAG-3'          |
| GABPA-R                               | 5'-CCCTCGAGTCGGAGGGGAGCTTGA ACTA-3'         |
| GABPB-F                               | 5'-GGGGTACCTCCTTCCGTCTCCAGGATT-3'           |
| GABPB-R                               | 5'-CCCTCGAGAATCCCCACCGAAAAGTCCC-3'          |
| TERT-F                                | 5'-CGACGCGTGGCTCCCAGTGGATTTCGC-3'           |
| TERT-R                                | 5'-CCGCTCGAGCCTCGCGGTAGTGGCTG-3'            |
| <b>Mutagenesis</b>                    |                                             |
| FOS-T232A-F                           | 5'-CCAGAGGTTGCCGCCCCGGAGTCTG-3'             |
| FOS-T232A-R                           | 5'-CAGACTCCGGGGCGGCAACCTCTGG-3'             |
| FOS-T325A-F                           | 5'-GAGCCCCTGTGCGCTCCGGTGGTCA-3'             |
| FOS-T325A-R                           | 5'-TGACCACCGGAGCGCACAGGGGCTC-3'             |
| FOS-T331A-F                           | 5'-GGTGGTCACCTGTGCTCCCAGCTGCAC-3'           |
| FOS-T331A-R                           | 5'-GTGCAGCTGGGAGCACAGGTGACCACC-3'           |
| FOS-S374A-F                           | 5'-GACTCGCTCAGCGCACCCACGCTGC-3'             |
| FOS-S374A-R                           | 5'-GCAGCGTGGGTGCGCTGAGCGAGTC-3'             |
| BRAF-A1799T-F                         | 5'-ATTTTGGTCTAGCTACAGTGAAATCTCGATGGAGTGG-3' |
| BRAF-A1799T-R                         | 5'-CCACTCCATCGAGATTTCACTGTAGCTAGACCAAAAT-3' |
| TERT-C228T-F                          | 5'-GGCCCAGCCCCTTCCGGGCCCTC-3'               |
| TERT-C228T-R                          | 5'-GAGGGCCCCGGAAGGGGCTGGGCC-3'              |
| TERT-C250T-F                          | 5'-CCGTCCCGACCCCTTCCGGGTCC-3'               |
| TERT-C250T-R                          | 5'-GGACCCGGAAGGGGTCTGGGACGG-3'              |
| GABPB-FOS-binding-mut-F               | 5'-GGATGCTGGGAGCTAGACTCACTCGCACA-3'         |
| GABPB-FOS-binding-mut-R               | 5'-TGTGCGAGTGAGTCTAGCTCCCAGCATCC-3'         |
| GABPB-MYC-binding-mut-F               | 5'-CTCACTCGCACACGATGTGTCCCTCCG-3'           |
| GABPB-MYC-binding-mut-R               | 5'-CGGAGGGACACATCGTGTGCGAGTGAG-3'           |
| <b>ChIP assay</b>                     |                                             |
| TERT-F                                | 5'-GGATTCGCGGGCACAGAC-3'                    |
| TERT-R                                | 5'-GGGAGCGCGCGGCATCG-3'                     |
| GABPB-F                               | 5'-AAAGATTCCGCACTCTCCGT-3'                  |
| GABPB-R                               | 5'-AATCCCCACCGAAAAGTCCC-3'                  |
